# Supplementary material
Source: PubMed Central journal article supplement (PMC5320968)
Supplement: pnas.1605660114.sapp.pdf [file pnas.1605660114.sapp.pdf]

# SI Appendix

## Evidence that the Rate of Strong Selective Sweeps Increases with Population Size in the Great Apes

Kiwoong Nam<sup>a</sup>, Kasper Munch<sup>a</sup>, Thomas Mailund<sup>a</sup>, Alexander Nater<sup>b,c</sup>, Maja Greminger<sup>b,c</sup>, Michael Krützen<sup>c</sup>, Tomàs Marquès-Bonet<sup>d,e,f</sup>, Mikkel Heide Schierup<sup>a,g</sup>

<sup>a</sup>Bioinformatics Research Centre, Aarhus University, DK-8000 Aarhus C, Denmark.

<sup>b</sup>Department of Evolutionary Biology and Environmental Studies, University of Zurich, 8057 Zurich, Switzerland

<sup>c</sup>Anthropological Institute and Museum, University of Zurich, 8057 Zurich, Switzerland

<sup>d</sup>Institut de Biologia Evolutiva, (CSIC-Universitat Pompeu Fabra), PRBB, Doctor Aiguader 88, Barcelona, Catalonia 08003, Spain.

<sup>e</sup>Institució Catalana de Recerca i Estudis Avançats (ICREA), Barcelona, Catalonia 08010, Spain.

<sup>f</sup>Centro Nacional de Analisis Genomico (CRG-CNAG), Baldiri Reixach 4-8, 08023 Barcelona, Spain

<sup>g</sup>Department of Bioscience, Aarhus University, DK-8000 Aarhus C, Denmark.

## Supplementary Tables

Table S1. **The information of taxa used in this study**

| Common name                 | Scientific name                       | Number of individuals |
|-----------------------------|---------------------------------------|-----------------------|
| Human                       | <i>Homo sapiens</i>                   | 9                     |
| Bonobo                      | <i>Pan paniscus</i>                   | 13                    |
| Central Chimpanzee          | <i>Pan troglodytes troglodytes</i>    | 4                     |
| Eastern Chimpanzee          | <i>Pan troglodytes schweinfurthii</i> | 6                     |
| Western Chimpanzee          | <i>Pan troglodytes verus</i>          | 5                     |
| Nigeria Cameroon Chimpanzee | <i>Pan troglodytes ellioti</i>        | 10                    |
| Eastern Lowland Gorilla     | <i>Gorilla beringei graueri</i>       | 3                     |
| Western Lowland Gorilla     | <i>Gorilla gorilla gorilla</i>        | 27                    |
| Sumatran Orangutan          | <i>Pongo abelii</i>                   | 5                     |
| Bornean Orangutan           | <i>Pongo pygmaeus</i>                 | 5                     |

Table S2. **The information for each chromosome.** The length of chromosomes, the number of called positions and the number of SNPs in each taxon for each chromosome.

| Chromosome | Chromosome length | Called        | Number of SNP |           |               |               |               |                        |                         |                         |                |               |
|------------|-------------------|---------------|---------------|-----------|---------------|---------------|---------------|------------------------|-------------------------|-------------------------|----------------|---------------|
|            |                   |               | Humans        | Bonobo    | Central Chimp | Eastern Chimp | Western Chimp | Nigeria Cameroon Chimp | Eastern Lowland Gorilla | Western Lowland Gorilla | Sumatran Orang | Bornean Orang |
| chr1       | 247,249,719       | 160,880,685   | 524,659       | 532,077   | 753,781       | 702,539       | 738,892       | 401,273                | 246,742                 | 1,076,881               | 914,308        | 653,958       |
| chr2       | 242,951,149       | 178,023,644   | 590,073       | 615,637   | 903,996       | 810,204       | 855,174       | 426,799                | 258,017                 | 1,261,636               | 1,077,591      | 753,329       |
| chr3       | 199,501,827       | 149,518,151   | 507,464       | 501,741   | 759,156       | 669,066       | 696,690       | 349,394                | 231,696                 | 1,031,974               | 882,837        | 617,080       |
| chr4       | 191,273,063       | 140,398,337   | 497,502       | 499,566   | 751,745       | 656,108       | 704,374       | 300,581                | 233,459                 | 1,068,263               | 962,245        | 673,556       |
| chr5       | 180,857,866       | 132,273,796   | 445,741       | 457,800   | 671,543       | 598,132       | 631,469       | 291,695                | 197,085                 | 956,564                 | 830,049        | 585,159       |
| chr6       | 170,899,992       | 124,881,358   | 434,679       | 441,828   | 608,543       | 558,000       | 594,738       | 341,588                | 192,778                 | 885,763                 | 765,994        | 546,720       |
| chr7       | 158,821,424       | 105,796,935   | 371,207       | 375,976   | 532,815       | 489,230       | 516,539       | 287,830                | 163,721                 | 763,850                 | 633,918        | 453,587       |
| chr8       | 146,274,826       | 106,897,938   | 388,689       | 376,858   | 565,678       | 513,377       | 534,323       | 256,923                | 177,287                 | 793,517                 | 714,506        | 501,791       |
| chr9       | 140,273,252       | 80,518,518    | 297,208       | 295,644   | 434,652       | 384,594       | 413,264       | 214,414                | 121,451                 | 575,041                 | 511,923        | 338,889       |
| chr10      | 135,374,737       | 93,075,998    | 332,059       | 332,026   | 480,970       | 428,533       | 450,665       | 195,541                | 142,553                 | 691,889                 | 620,383        | 418,648       |
| chr11      | 134,452,384       | 92,310,050    | 315,792       | 313,337   | 447,758       | 405,996       | 426,195       | 220,131                | 116,623                 | 648,986                 | 546,936        | 381,892       |
| chr12      | 132,349,534       | 97,193,825    | 320,773       | 332,003   | 466,816       | 426,115       | 450,904       | 262,120                | 143,781                 | 661,486                 | 561,514        | 365,844       |
| chr13      | 114,142,980       | 70,684,904    | 242,844       | 241,450   | 366,737       | 333,965       | 352,990       | 187,643                | 119,672                 | 526,443                 | 474,900        | 326,162       |
| chr14      | 106,368,585       | 64,504,906    | 219,620       | 226,685   | 313,562       | 284,567       | 308,687       | 177,637                | 94,913                  | 461,982                 | 398,533        | 276,116       |
| chr15      | 100,338,915       | 56,493,900    | 196,969       | 190,789   | 271,299       | 247,355       | 261,973       | 145,614                | 80,995                  | 379,143                 | 327,720        | 236,253       |
| chr16      | 88,827,254        | 49,858,432    | 198,075       | 190,344   | 269,525       | 247,237       | 260,878       | 159,158                | 86,384                  | 363,871                 | 310,499        | 223,654       |
| chr17      | 78,774,742        | 50,696,851    | 165,695       | 170,816   | 248,630       | 222,955       | 231,674       | 96,969                 | 67,633                  | 327,025                 | 306,148        | 210,212       |
| chr18      | 76,117,153        | 57,568,302    | 205,893       | 208,815   | 301,583       | 267,285       | 282,747       | 121,829                | 97,290                  | 433,232                 | 376,497        | 259,327       |
| chr19      | 63,811,651        | 29,695,141    | 107,273       | 110,796   | 145,318       | 133,290       | 141,827       | 89,916                 | 44,932                  | 213,185                 | 191,953        | 137,617       |
| chr20      | 62,435,964        | 44,682,113    | 156,021       | 160,191   | 227,739       | 205,784       | 214,291       | 113,235                | 53,552                  | 322,647                 | 271,899        | 183,520       |
| chr21      | 46,944,323        | 24,441,662    | 95,257        | 96,903    | 140,852       | 125,625       | 134,921       | 76,251                 | 40,093                  | 210,164                 | 188,300        | 125,382       |
| chr22      | 49,691,432        | 21,290,071    | 78,197        | 82,028    | 110,440       | 98,838        | 105,023       | 49,288                 | 33,617                  | 155,687                 | 145,205        | 95,163        |
| Sum        | 2,867,732,772     | 1,931,685,517 | 6,691,690     | 6,753,310 | 9,773,138     | 8,808,795     | 9,308,238     | 4,765,829              | 2,978,829               | 13,809,229              | 12,013,858     | 8,363,859     |

**Table S3. Rate of beneficial mutations and rate of positive selection in the simulated data** For different selection coefficient (0.01 and 0.02), we compared the number of positively selected sites in genes between simulations in which total numbers of arisen beneficial mutations are the same but  $Ns$  differs by a factor of two.

| $s$  | $N$  | proportion beneficial mutation | no. of beneficial mutation expected | no. of fixed beneficial mutations expected ( $2s$ ) | no. of positively selected sites |
|------|------|--------------------------------|-------------------------------------|-----------------------------------------------------|----------------------------------|
| 0.01 | 2000 | 0.0005                         | 500                                 | 10                                                  | 9.21                             |
|      | 1000 | 0.001                          | 500                                 | 10                                                  | 9.14                             |
|      | 2000 | 0.001                          | 1000                                | 20                                                  | 18.19                            |
|      | 1000 | 0.002                          | 1000                                | 20                                                  | 18.07                            |
| 0.02 | 2000 | 0.0005                         | 500                                 | 20                                                  | 18.68                            |
|      | 1000 | 0.001                          | 500                                 | 20                                                  | 18.41                            |
|      | 2000 | 0.001                          | 1000                                | 40                                                  | 36.27                            |
|      | 1000 | 0.002                          | 1000                                | 40                                                  | 36.72                            |

## Supplementary Figures

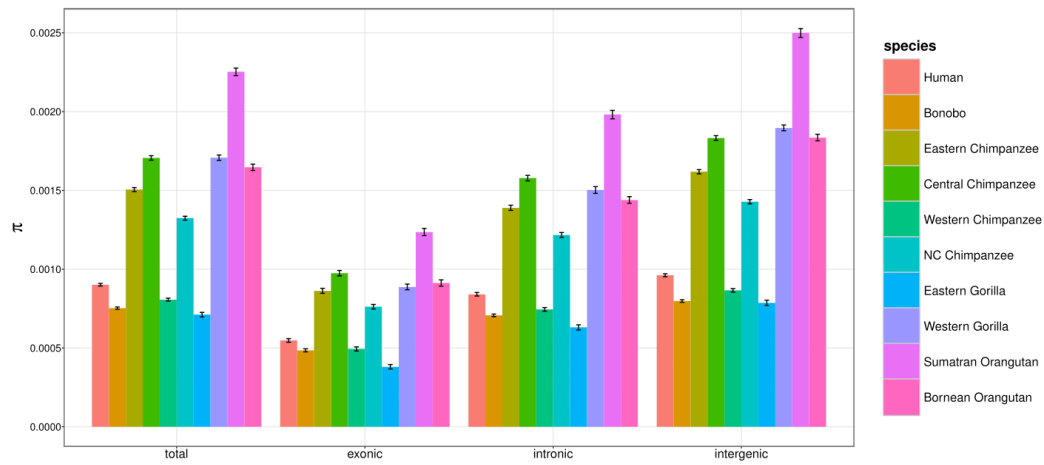

Fig. S1. **Diversity patterns** The diversity levels of total genomes, exons, introns, and intergenic regions calculated from each species.

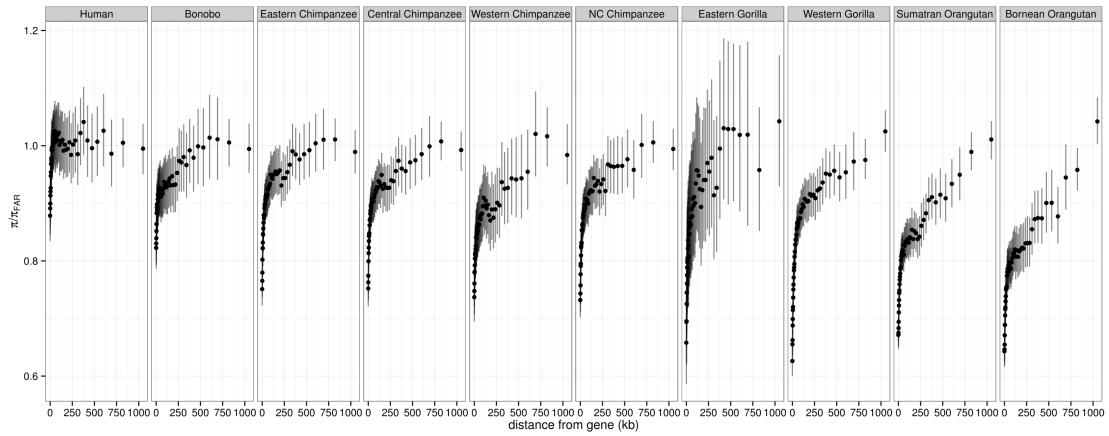

**Fig. S2. The reduced diversity near gene** The plots show a relationship between nucleotide diversity,  $\pi$ , and physical distance from the nearest genes. The diversity is normalized to the diversity far away from genes (> 823 kb). The error bars indicate 95% of the confidence intervals calculated from bootstrapping with 1,000 replicates resampled from 1mb windows.

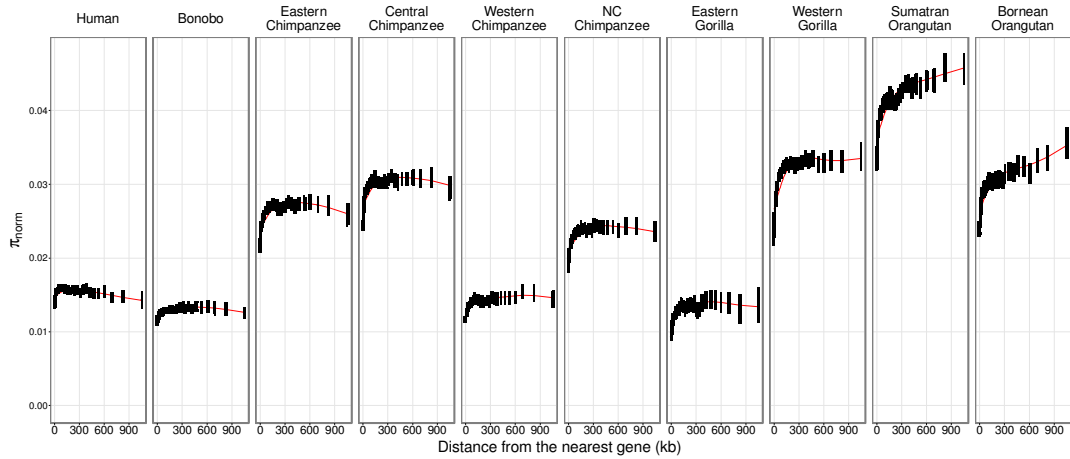

**Fig. S3. The normalized diversity according to the distance from gene** The plot shows a relationship between normalized  $\pi$  with the divergence between humans and macaques and physical distance from the nearest genes. The error bars indicate 95% of the confidence intervals calculated from bootstrapping with 1,000 replicates resampled from 1mb windows. The red bars indicate the non-linear regression curves generated by smooth spline (df=4).

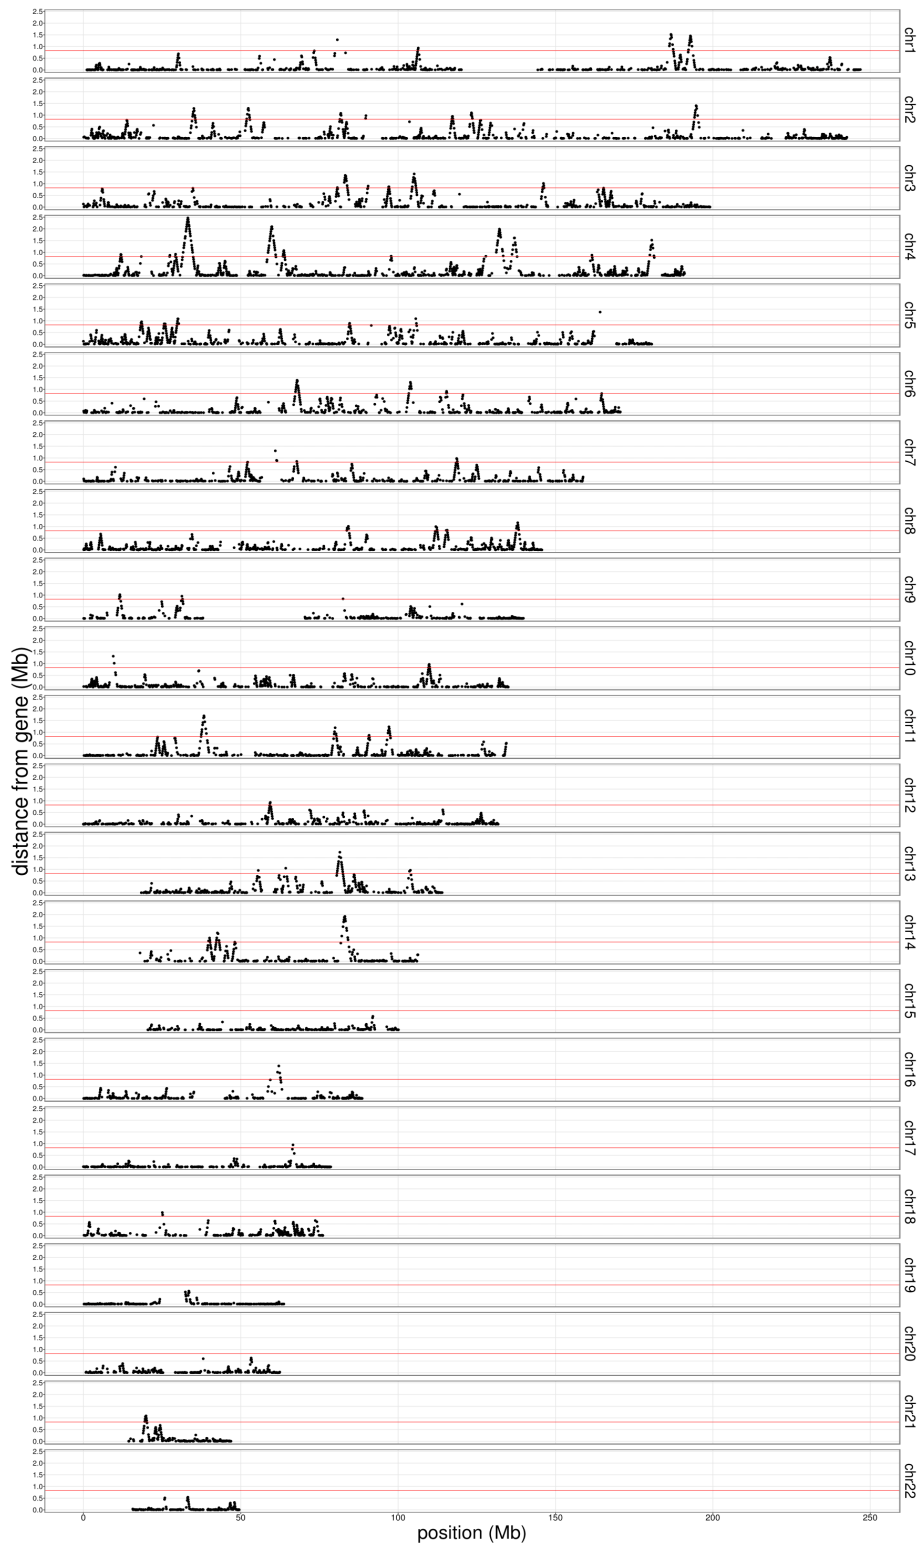

Fig. S4. **The spatial distribution of distance from genes.** The x axis represents the coordinates of each chromosome and y axis is the distance from the nearest genes (Mb). The red bars indicate the criterion on distance from  $m$  genes used to identify gene-deserts.



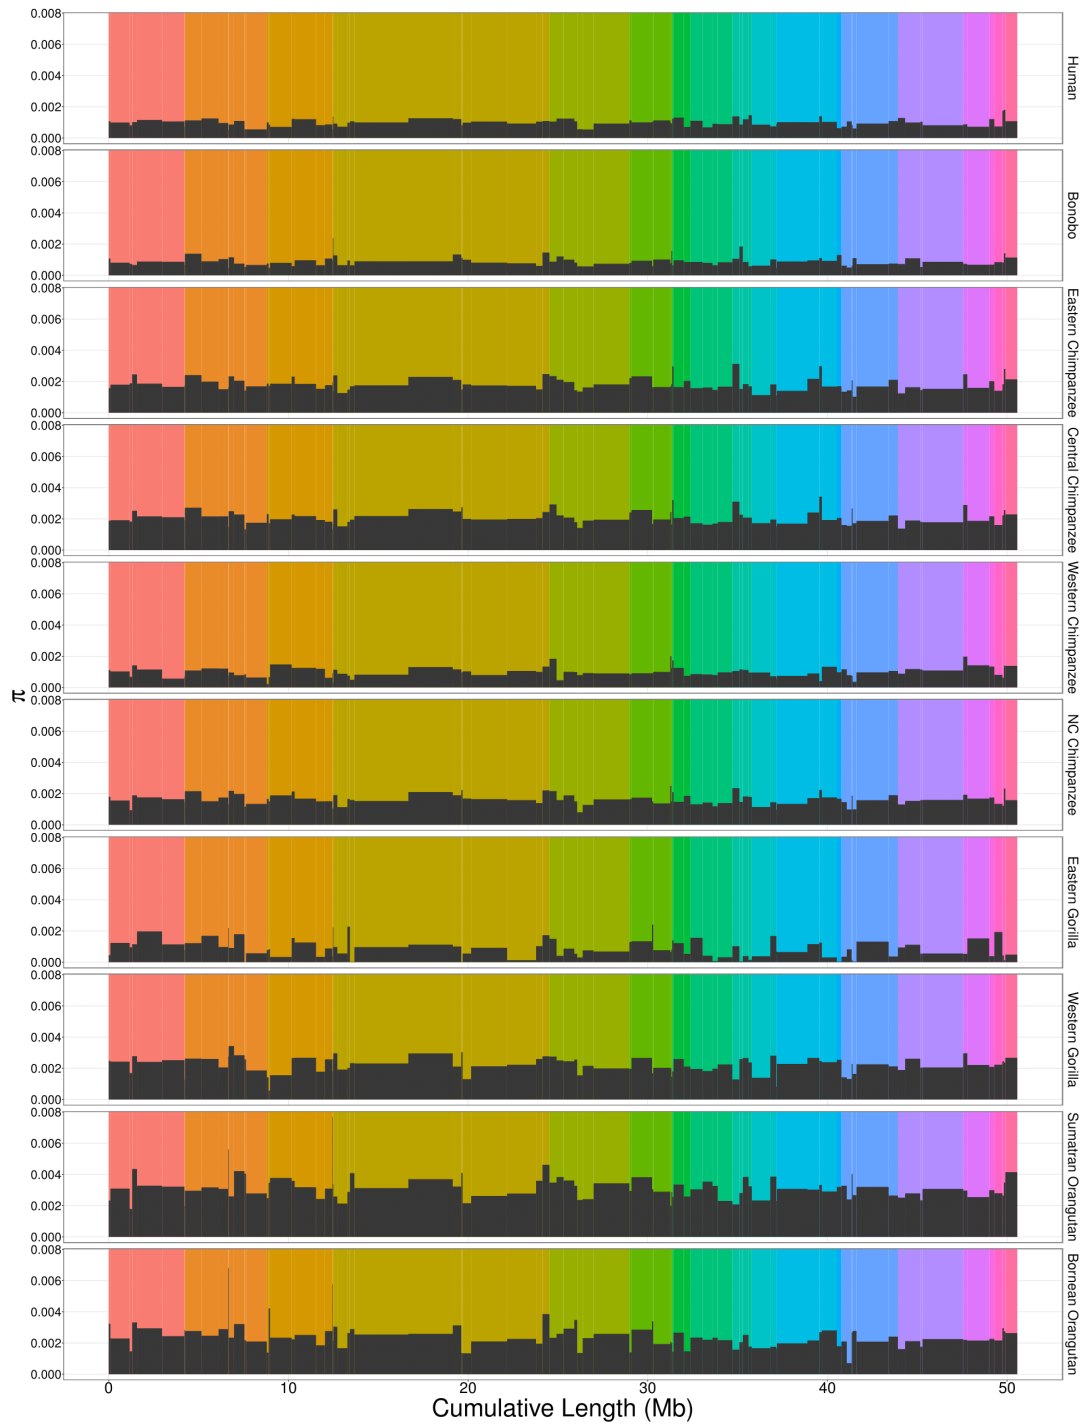

**Fig. S5. The nucleotide diversity of genomic loci far from genes.**

The width of each block represents the size of genomic loci far from genes (823 kb) and each background color shows chromosomes where these regions are found.

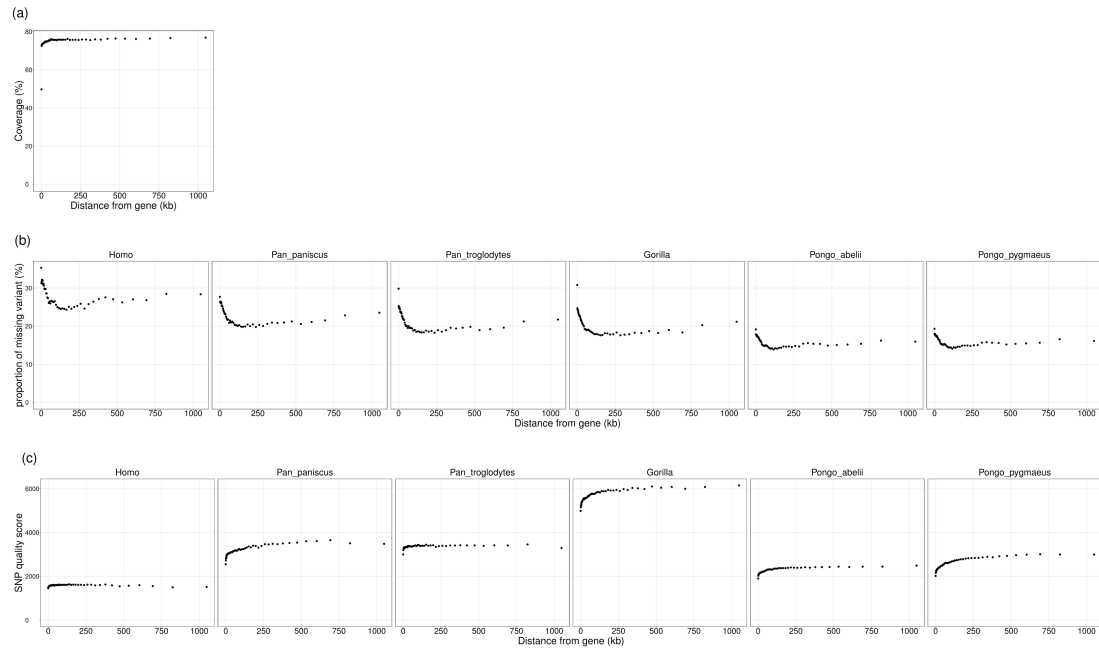

**Fig. S6. SNP quality according to the distance from genes**

(a) proportion of covered sequences after removing masked positions from at least one species, (b) the proportion of filtered out variant (c) and the SNP quality score.

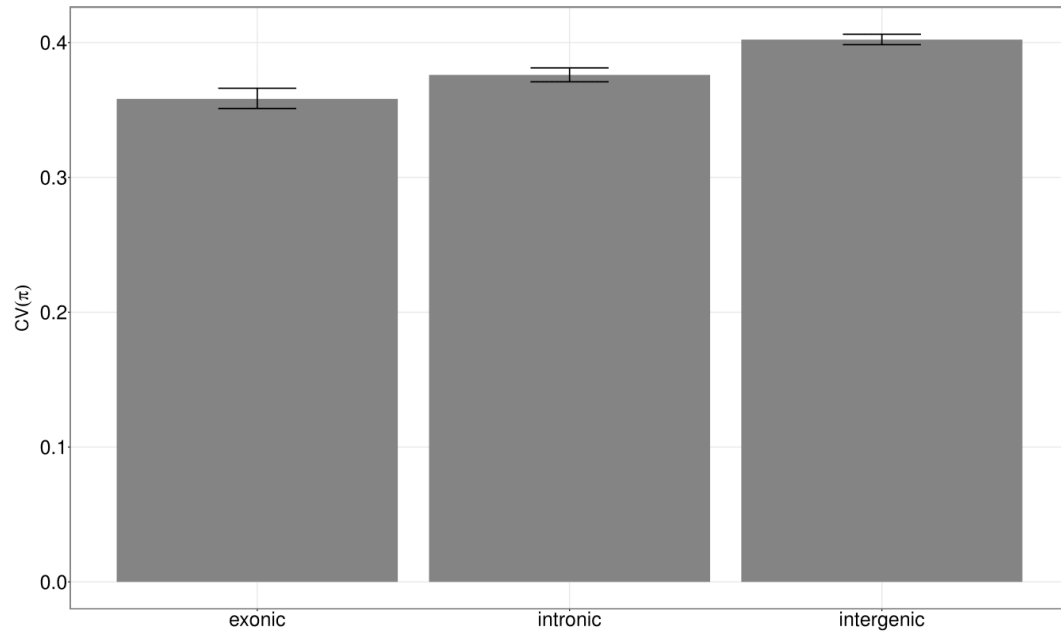

**Fig. S7. Heterogeneity of diversity according to annotation** The coefficient of variance of  $\pi$  in exonic, intronic, and intergenic sequences are shown. The error bars indicate 95% confidence intervals calculated from bootstrapping with 1,000 replicates resampled from 1Mb windows.

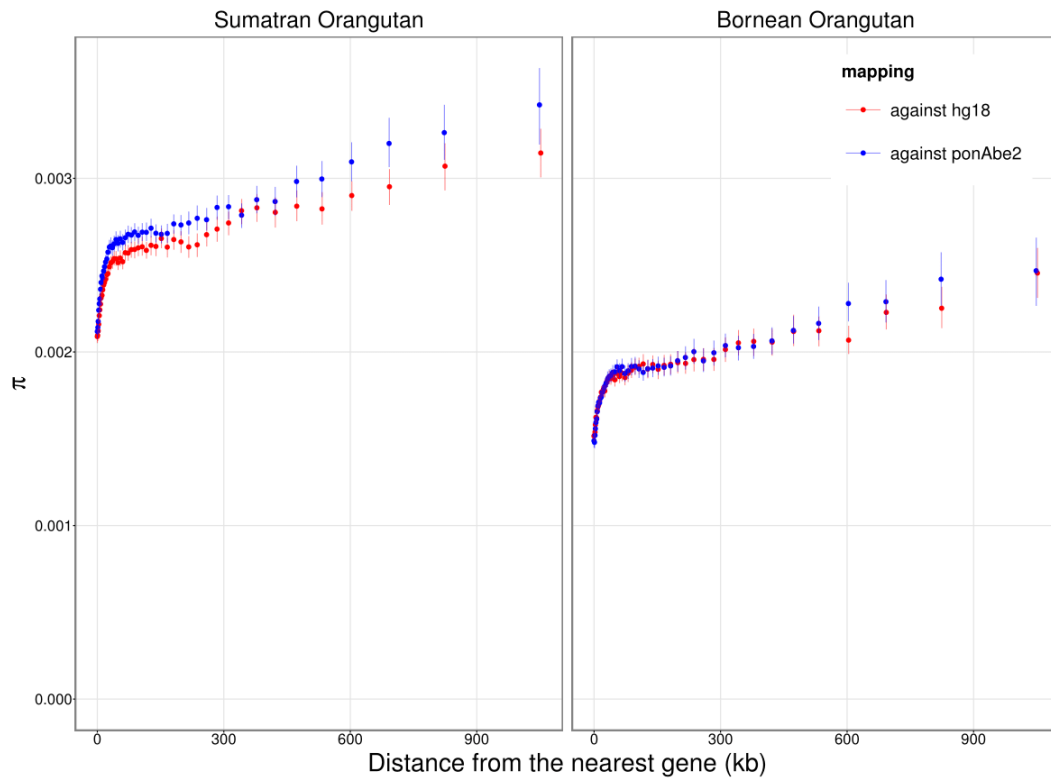

**Fig. S8. The diversity pattern away from genes in orangutans with different reference mappings.** Red points show estimated  $\pi$  for mapping against hg18 (human), identical to results from Figure 1, blue points show estimates for mapping against ponabe2 (orangutan).

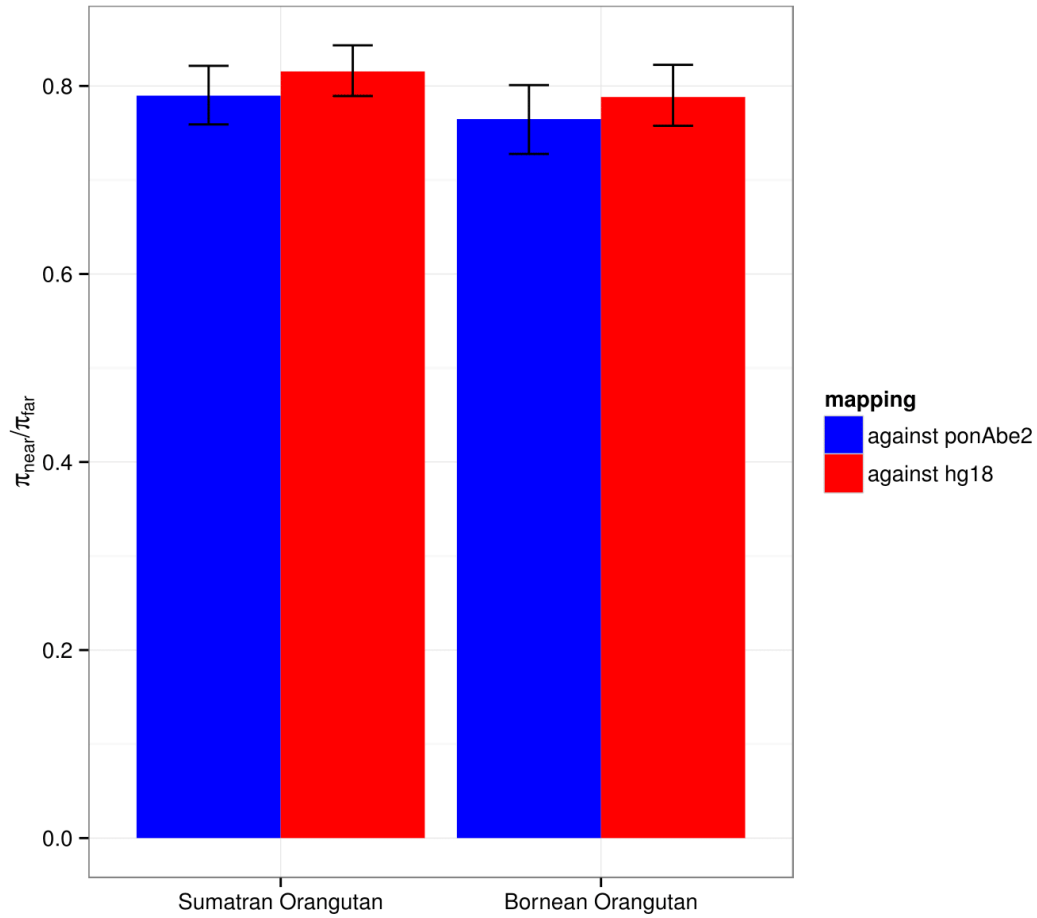

**Fig. S9. Reduction in diversity levels near genes in orangutans** The diversity ratio of gene deserts (in which distance from genes is larger than 823 kb) to the rest of intergenic regions in orangutans, calculated from the mapping against human (hg18) and orangutan (PonAbe2) reference genome. The error bars indicate 95% confidence intervals calculated from 1,000 times of bootstrapping.

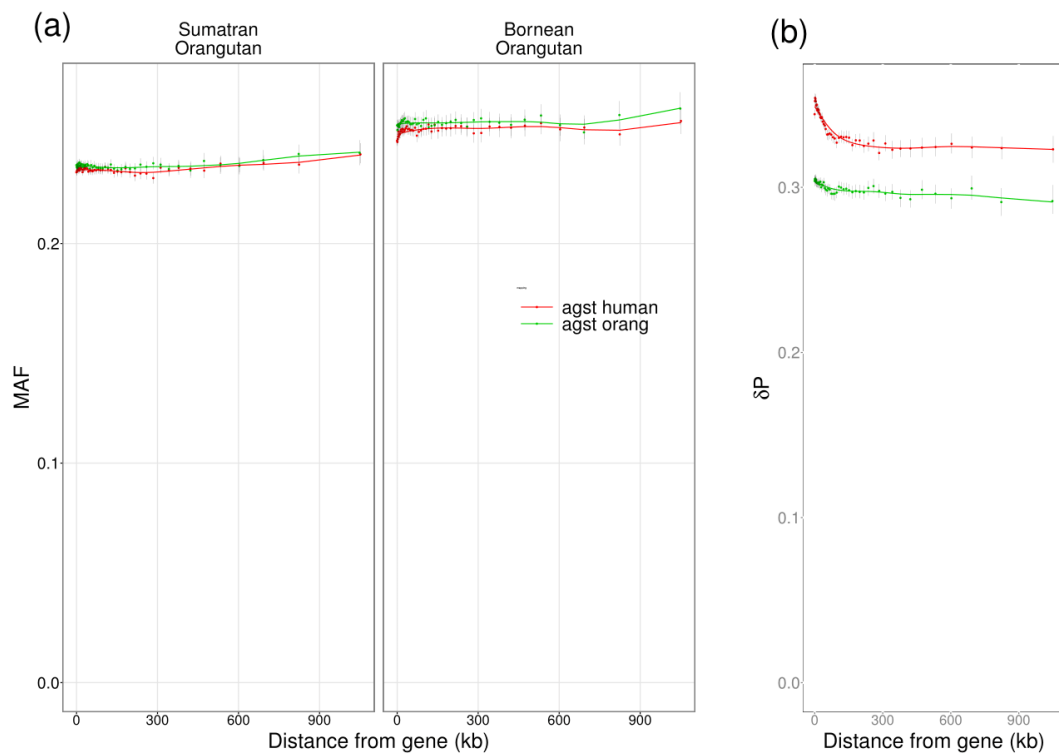

**Fig. S10. The diversity pattern from different mappings.** The relationship between distance from genes and the (a) diversity levels and (b) population differentiation, calculated from variants of orangutans identified by the mapping against human (red) and orangutan (green) reference genomes.

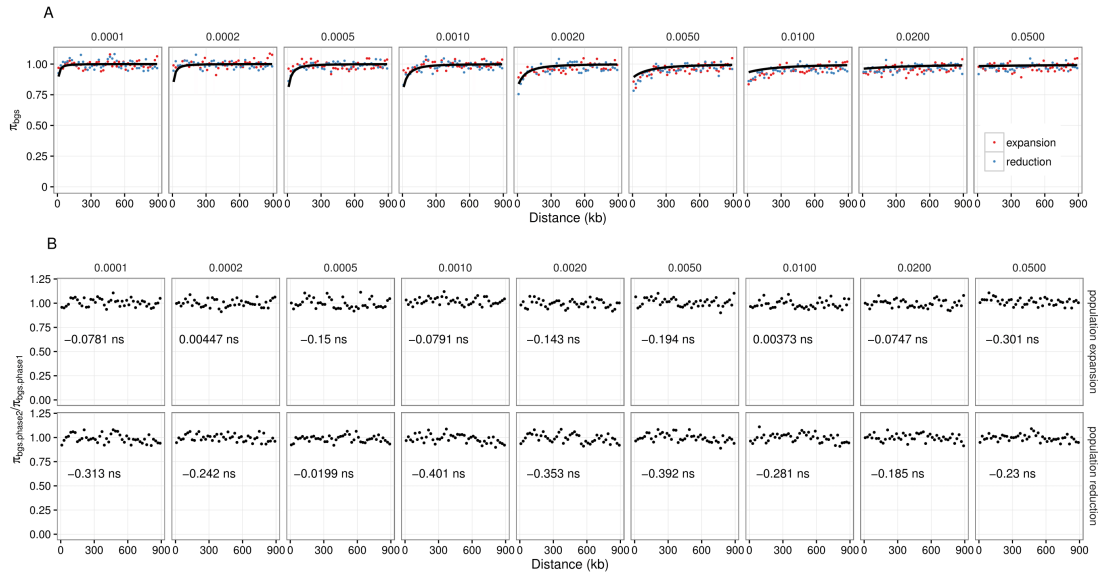

**Fig. S11. The effect of changes in  $N$  in background selection** The diversity pattern in the sequences flanking the genic region under evolutionary constraint (selection coefficients ranging from 0.0001 to 0.05), when a population experiences a recent expansion (from  $N = 1,000$  to  $N = 2,000$ ) or reduction (from  $N = 2,000$  to  $N = 1,000$ ) 100 generations ago. For each set of parameters, we performed 1,000 independent simulations and report the average  $\pi$ . (a) The relationship between the distance from genes and  $\pi_{BGS}$ , diversity reduction due to background selection. The black lines indicate theoretical predictions of reduction in diversity by background selection (Durrett, 2008). Red and blue points represent population expansion and reduction, respectively. (b) The relationship between the distance from genes and the ratio of  $\pi_{BGS,phase2}$  ( $\pi_{BGS}$  after changes in  $N$ ) to  $\pi_{BGS,phase1}$  ( $\pi_{BGS}$  before changes in  $N$ ). The Spearman's correlation coefficient and the significance are shown in each panel (\*\*\*, \*\*, \*, and ns indicate Bonferroni-corrected p-values with  $< 0.001$ ,  $< 0.01$ ,  $< 0.05$ , and  $\geq 0.05$ , respectively).

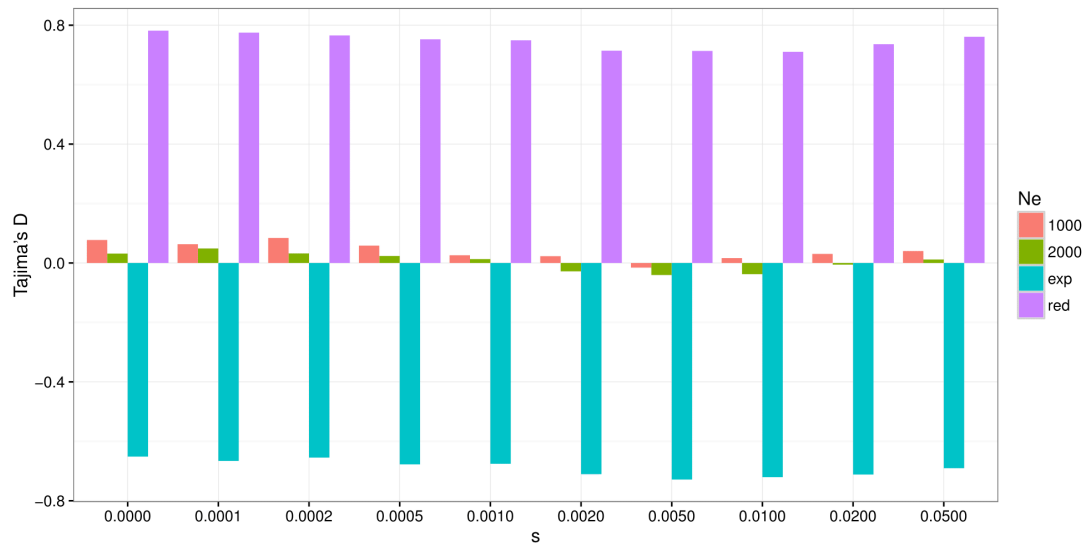

Fig. S12. **The skewness of site frequency spectrum** Tajima's D is calculated from different selection coefficients of deleterious mutations (ranging from 0 to 0.05), when a population size is constant ( $N = 1,000$  or  $N = 2,000$ ) or a population experiences a sudden expansion ( $N = 1,000$  to  $N = 2,000$ ) or reduction ( $N = 2,000$  to  $N = 1,000$ ) 100 generations ago.



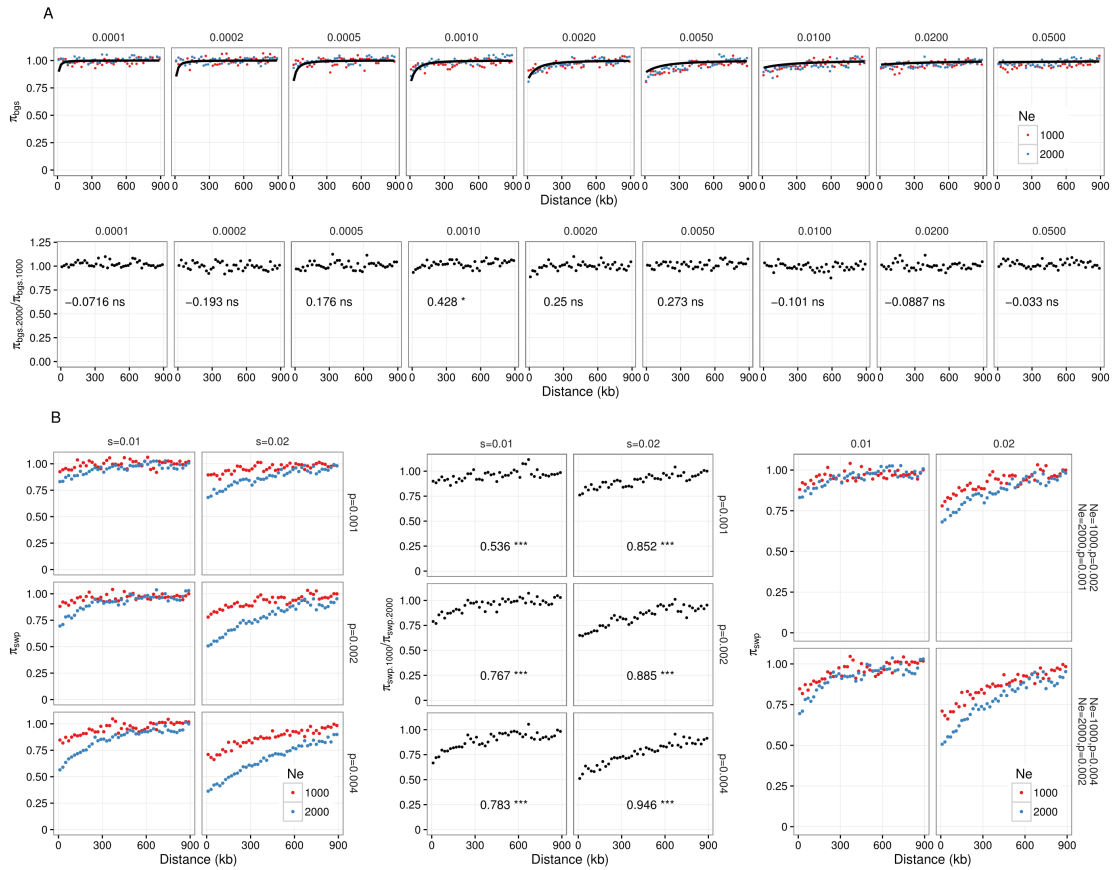

**Fig. S13. Simulations of diversity reduction by selective sweeps and background selection** The reduction in diversity due to background selection,  $\pi_{BGS}$ , and selective sweeps,  $\pi_{SWP}$ , is calculated from 900 kb intergenic sequences that are flanked by 100 kb genic sequences. The mutation rate is  $1.2 \times 10^{-8}$  per site per generation. (a) The upper panel shows the relationship between the distance from gene and  $\pi_{BGS}$  with selection coefficient ranging from 0.0001 to 0.05. The lower panel shows the relationship between the distance from genes and the ratio of  $\pi_{BGS}$  when  $N = 2,000$  to  $\pi_{BGS}$  to  $N = 1,000$ . (b) The left panel shows the relationship between the distance from genes and  $\pi_{SWP}$ , when the proportion of beneficial mutation ranges 0.001 to 0.004 and selection coefficient is 0.01 or 0.02. The middle panel shows the relationship between the distance from genes and the ratio of  $\pi_{SWP}$  when  $N = 2,000$  to  $\pi_{SWP}$  to  $N = 1,000$ . The right panel shows  $\pi_{SWP}$  as a function of distance from genes when the number of beneficial mutations per generation is the same but  $N$  differs by a factor of two.
